# Supplementary material for: Rearranged During Transfection Rearrangement Detection by Fluorescence In Situ Hybridization Compared With Other Techniques in NSCLC
Source: PubMed Central journal article supplement (PMC11539407; doi:10.1016/j.jtocrr.2024.100714), 2024-08-29
Supplement: mmc1.pdf [file mmc1.pdf]

**Supplementary Table S1: Complete list of studies published between 2000 and 2022 mentioning *RET* FISH in their methodology (in bold, studies reported in Tables 1a and 1b).**

|             |                 |                                                                                                                                                                                 |                                                                                                   |
|-------------|-----------------|---------------------------------------------------------------------------------------------------------------------------------------------------------------------------------|---------------------------------------------------------------------------------------------------|
| 2000        | Cinti           | RET rearrangements in papillary thyroid carcinomas and adenomas detected by interphase FISH                                                                                     | <a href="https://pubmed.ncbi.nlm.nih.gov/10773666/">https://pubmed.ncbi.nlm.nih.gov/10773666/</a> |
| 2000        | Corvi           | RET/PCM-1: a novel fusion gene in papillary thyroid carcinoma                                                                                                                   | <a href="https://pubmed.ncbi.nlm.nih.gov/10980597/">https://pubmed.ncbi.nlm.nih.gov/10980597/</a> |
| 2001        | Corvi           | Frequent RET rearrangements in thyroid papillary microcarcinoma detected by interphase fluorescence in situ hybridization                                                       | <a href="https://pubmed.ncbi.nlm.nih.gov/11742034/">https://pubmed.ncbi.nlm.nih.gov/11742034/</a> |
| 2001        | Corvi           | RET rearrangements in familial papillary thyroid carcinomas                                                                                                                     | <a href="https://pubmed.ncbi.nlm.nih.gov/11463498/">https://pubmed.ncbi.nlm.nih.gov/11463498/</a> |
| 2006        | Zhu             | Prevalence of RET/PTC rearrangements in thyroid papillary carcinomas: effects of the detection methods and genetic heterogeneity                                                | <a href="https://pubmed.ncbi.nlm.nih.gov/16772343/">https://pubmed.ncbi.nlm.nih.gov/16772343/</a> |
| <b>2012</b> | <b>Takeuchi</b> | <b>RET, ROS1 and ALK fusions in lung cancer</b>                                                                                                                                 | <a href="https://pubmed.ncbi.nlm.nih.gov/22327623/">https://pubmed.ncbi.nlm.nih.gov/22327623/</a> |
| <b>2012</b> | <b>Kohno</b>    | <b>KIF5B-RET fusions in lung adenocarcinoma</b>                                                                                                                                 | <a href="https://pubmed.ncbi.nlm.nih.gov/22327624/">https://pubmed.ncbi.nlm.nih.gov/22327624/</a> |
| <b>2012</b> | <b>Wang</b>     | <b>RET fusions define a unique molecular and clinicopathologic subtype of non-small-cell lung cancer</b>                                                                        | <a href="https://pubmed.ncbi.nlm.nih.gov/23150706/">https://pubmed.ncbi.nlm.nih.gov/23150706/</a> |
| <b>2012</b> | <b>Suehara</b>  | <b>Identification of KIF5B-RET and GOPC-ROS1 fusions in lung adenocarcinomas through a comprehensive mRNA-based screen for tyrosine kinase fusions</b>                          | <a href="https://pubmed.ncbi.nlm.nih.gov/23052255/">https://pubmed.ncbi.nlm.nih.gov/23052255/</a> |
| <b>2012</b> | <b>Sasaki</b>   | <b>RET expression and detection of KIF5B/RET gene rearrangements in Japanese lung cancer</b>                                                                                    | <a href="https://pubmed.ncbi.nlm.nih.gov/23342255/">https://pubmed.ncbi.nlm.nih.gov/23342255/</a> |
| 2013        | Drilon          | Response to Cabozantinib in patients with RET fusion-positive lung adenocarcinomas                                                                                              | <a href="https://pubmed.ncbi.nlm.nih.gov/23533264/">https://pubmed.ncbi.nlm.nih.gov/23533264/</a> |
| 2013        | Caria           | Assessing RET/PTC in thyroid nodule fine-needle aspirates: the FISH point of view                                                                                               | <a href="https://pubmed.ncbi.nlm.nih.gov/23722226/">https://pubmed.ncbi.nlm.nih.gov/23722226/</a> |
| <b>2013</b> | <b>Go</b>       | <b>Diagnostic method for the detection of KIF5B-RET transformation in lung adenocarcinoma</b>                                                                                   | <a href="https://pubmed.ncbi.nlm.nih.gov/23932363/">https://pubmed.ncbi.nlm.nih.gov/23932363/</a> |
| <b>2013</b> | <b>Borrelli</b> | <b>KIF5B/RET fusion gene analysis in a selected series of cytological specimens of EGFR, KRAS and EML4-ALK wild-type adenocarcinomas of the lung</b>                            | <a href="https://pubmed.ncbi.nlm.nih.gov/23891510/">https://pubmed.ncbi.nlm.nih.gov/23891510/</a> |
| <b>2014</b> | <b>Tsuta</b>    | <b>RET-rearranged non-small-cell lung carcinoma: a clinicopathological and molecular analysis</b>                                                                               | <a href="https://pubmed.ncbi.nlm.nih.gov/24504365/">https://pubmed.ncbi.nlm.nih.gov/24504365/</a> |
| <b>2014</b> | <b>Pan</b>      | <b>ALK, ROS1 and RET fusions in 1139 lung adenocarcinomas: a comprehensive study of common and fusion pattern-specific clinicopathologic, histologic and cytologic features</b> | <a href="https://pubmed.ncbi.nlm.nih.gov/24629636/">https://pubmed.ncbi.nlm.nih.gov/24629636/</a> |
| <b>2014</b> | <b>Lira</b>     | <b>A single-tube multiplexed assay for detecting ALK, ROS1, and RET fusions in lung cancer</b>                                                                                  | <a href="https://pubmed.ncbi.nlm.nih.gov/24418728/">https://pubmed.ncbi.nlm.nih.gov/24418728/</a> |
| 2014        | Mizukami        | Molecular mechanisms underlying oncogenic RET fusion in lung adenocarcinoma                                                                                                     | <a href="https://pubmed.ncbi.nlm.nih.gov/24722152/">https://pubmed.ncbi.nlm.nih.gov/24722152/</a> |
| 2015        | Zhang           | An Evaluation and Recommendation of the Optimal Methodologies to Detect RET Gene Rearrangements in Papillary Thyroid Carcinoma                                                  | <a href="https://pubmed.ncbi.nlm.nih.gov/25407564/">https://pubmed.ncbi.nlm.nih.gov/25407564/</a> |
| <b>2015</b> | <b>Lee</b>      | <b>Comprehensive analysis of RET and ROS1 rearrangement in lung adenocarcinoma</b>                                                                                              | <a href="https://pubmed.ncbi.nlm.nih.gov/25234288/">https://pubmed.ncbi.nlm.nih.gov/25234288/</a> |

|             |                |                                                                                                                                                                                                      |                                                                                                   |
|-------------|----------------|------------------------------------------------------------------------------------------------------------------------------------------------------------------------------------------------------|---------------------------------------------------------------------------------------------------|
| 2015        | Colato         | Break-apart interphase fluorescence in situ hybridization assay in papillary thyroid carcinoma: on the road to optimizing the cut-off level for RET/PTC rearrangements                               | <a href="https://pubmed.ncbi.nlm.nih.gov/25698220/">https://pubmed.ncbi.nlm.nih.gov/25698220/</a> |
| <b>2015</b> | <b>Kim</b>     | <b>KIF5B-RET Fusion gene may coincide oncogenic mutations of EGFR or KRAS gene in lung adenocarcinomas</b>                                                                                           | <a href="https://pubmed.ncbi.nlm.nih.gov/26268359/">https://pubmed.ncbi.nlm.nih.gov/26268359/</a> |
| 2015        | Platt          | A retrospective analysis of RET translocation, gene copy number gain and expression in NSCLC patients treated with vandetanib in four randomized Phase III studies                                   | <a href="https://pubmed.ncbi.nlm.nih.gov/25881079/">https://pubmed.ncbi.nlm.nih.gov/25881079/</a> |
| 2015        | Subbiah        | Systemic and CNS activity of the RET inhibitor vandetanib combined with the mTOR inhibitor everolimus in KIF5B-RET re-arranged non-small cell lung cancer with brain metastases                      | <a href="https://pubmed.ncbi.nlm.nih.gov/25982012/">https://pubmed.ncbi.nlm.nih.gov/25982012/</a> |
| 2015        | Grubbs         | RET Fusion as a Novel Driver of Medullary Thyroid Carcinoma                                                                                                                                          | <a href="https://pubmed.ncbi.nlm.nih.gov/25546157/">https://pubmed.ncbi.nlm.nih.gov/25546157/</a> |
| 2015        | Drilon         | Broad, Hybrid Capture-Based Next-Generation Sequencing Identifies Actionable Genomic Alterations in Lung Adenocarcinomas Otherwise Negative for Such Alterations by Other Genomic Testing Approaches | <a href="https://pubmed.ncbi.nlm.nih.gov/25567908/">https://pubmed.ncbi.nlm.nih.gov/25567908/</a> |
| 2016        | Michels        | Clinicopathological Characteristics of RET Rearranged Lung Cancer in European Patients                                                                                                               | <a href="https://pubmed.ncbi.nlm.nih.gov/26762747/">https://pubmed.ncbi.nlm.nih.gov/26762747/</a> |
| 2016        | Lee            | Identification of a novel partner gene, KIAA1217, fused to RET: Functional characterization and inhibitor sensitivity of two isoforms in lung adenocarcinoma                                         | <a href="https://pubmed.ncbi.nlm.nih.gov/27150058/">https://pubmed.ncbi.nlm.nih.gov/27150058/</a> |
| 2016        | Lu             | 1p/19q codeletion and RET rearrangements in small-cell lung cancer                                                                                                                                   | <a href="https://pubmed.ncbi.nlm.nih.gov/27366094/">https://pubmed.ncbi.nlm.nih.gov/27366094/</a> |
| 2016        | Drilon         | Cabozantinib in patients with advanced RET-rearranged non-small-cell lung cancer: an open-label, single-centre, phase 2, single-arm trial                                                            | <a href="https://pubmed.ncbi.nlm.nih.gov/27825636/">https://pubmed.ncbi.nlm.nih.gov/27825636/</a> |
| 2016        | Catelain       | Detection of Gene Rearrangements in Circulating Tumor Cells: Examples of ALK-, ROS1-, RET-Rearrangements in Non-Small-Cell Lung Cancer and ERG-Rearrangements in Prostate Cancer                     | <a href="https://pubmed.ncbi.nlm.nih.gov/28560674/">https://pubmed.ncbi.nlm.nih.gov/28560674/</a> |
| <b>2016</b> | <b>Song</b>    | <b>Clinicopathological characteristics and survival of ALK, ROS1 and RET rearrangements in non-adenocarcinoma non-small cell lung cancer patients</b>                                                | <a href="https://pubmed.ncbi.nlm.nih.gov/27635639/">https://pubmed.ncbi.nlm.nih.gov/27635639/</a> |
| 2017        | Lee            | Vandetanib in pretreated patients with advanced non-small cell lung cancer-harboring RET rearrangement: a phase II clinical trial                                                                    | <a href="https://pubmed.ncbi.nlm.nih.gov/27803005/">https://pubmed.ncbi.nlm.nih.gov/27803005/</a> |
| 2017        | Dugay          | Clinicopathological characteristics of ROS1- and RET- rearranged NSCLC in caucasian patients: Data from a cohort of 713 non-squamous NSCLC lacking KRAS/EGFR/HER2/BRAF/PIK3CA/ALK alterations        | <a href="https://pubmed.ncbi.nlm.nih.gov/28881815/">https://pubmed.ncbi.nlm.nih.gov/28881815/</a> |
| <b>2017</b> | <b>Yoh</b>     | <b>Vandetanib in patients with previously treated RET-rearranged advanced non-small-cell lung cancer (LURET): an open-label, multicentre phase 2 trial</b>                                           | <a href="https://pubmed.ncbi.nlm.nih.gov/27825616/">https://pubmed.ncbi.nlm.nih.gov/27825616/</a> |
| <b>2017</b> | <b>Song</b>    | <b>Clinicopathologic characteristics, genetic variability and therapeutic options of RET rearrangements patients in lung adenocarcinoma</b>                                                          | <a href="https://pubmed.ncbi.nlm.nih.gov/27794403/">https://pubmed.ncbi.nlm.nih.gov/27794403/</a> |
| <b>2017</b> | <b>Reguart</b> | <b>Identification of ALK, ROS1, and RET Fusions by a Multiplexed mRNA-Based Assay in Formalin-Fixed, Paraffin-Embedded Samples from Advanced Non-Small-Cell Lung Cancer Patients</b>                 | <a href="https://pubmed.ncbi.nlm.nih.gov/28073897/">https://pubmed.ncbi.nlm.nih.gov/28073897/</a> |

|      |              |                                                                                                                                                                |                                                                                                   |
|------|--------------|----------------------------------------------------------------------------------------------------------------------------------------------------------------|---------------------------------------------------------------------------------------------------|
| 2017 | Rogers       | <b>Multiplexed transcriptome analysis to detect ALK, ROS1 and RET rearrangements in lung cancer</b>                                                            | <a href="https://pubmed.ncbi.nlm.nih.gov/28181564/">https://pubmed.ncbi.nlm.nih.gov/28181564/</a> |
| 2017 | Zhang        | Identification of a novel KIF13A-RET fusion in lung adenocarcinoma by next-generation sequencing                                                               | <a href="https://pubmed.ncbi.nlm.nih.gov/29571998/">https://pubmed.ncbi.nlm.nih.gov/29571998/</a> |
| 2017 | Uguen        | Asbestos-related lung cancers: A retrospective clinical and pathological study                                                                                 | <a href="https://pubmed.ncbi.nlm.nih.gov/28685091/">https://pubmed.ncbi.nlm.nih.gov/28685091/</a> |
| 2017 | Tanaka       | <b>Unique prevalence of oncogenic genetic alterations in young patients with lung adenocarcinoma</b>                                                           | <a href="https://pubmed.ncbi.nlm.nih.gov/28177518/">https://pubmed.ncbi.nlm.nih.gov/28177518/</a> |
| 2017 | Tang         | Coexistent genetic alterations involving ALK, RET, ROS1 or MET in 15 cases of lung adenocarcinoma                                                              | <a href="https://pubmed.ncbi.nlm.nih.gov/28914263/">https://pubmed.ncbi.nlm.nih.gov/28914263/</a> |
| 2018 | Skalova      | Molecular Profiling of Mammary Analog Secretory Carcinoma Revealed a Subset of Tumors Harboring a Novel ETV6-RET Translocation: Report of 10 Cases             | <a href="https://pubmed.ncbi.nlm.nih.gov/29076873/">https://pubmed.ncbi.nlm.nih.gov/29076873/</a> |
| 2018 | Piton        | <b>Ligation-dependent RT-PCR: a new specific and low-cost technique to detect ALK, ROS, and RET rearrangements in lung adenocarcinoma</b>                      | <a href="https://pubmed.ncbi.nlm.nih.gov/29251734/">https://pubmed.ncbi.nlm.nih.gov/29251734/</a> |
| 2018 | Uguen        | Asbestos-related lung cancers are rarely associated with ALK, ROS1 and RET rearrangements                                                                      | <a href="https://pubmed.ncbi.nlm.nih.gov/29519903/">https://pubmed.ncbi.nlm.nih.gov/29519903/</a> |
| 2018 | Kim          | <b>Detection of RET (rearranged during transfection) variants and their downstream signal molecules in RET rearranged lung adenocarcinoma patients</b>         | <a href="https://pubmed.ncbi.nlm.nih.gov/29549897/">https://pubmed.ncbi.nlm.nih.gov/29549897/</a> |
| 2018 | Kim          | NCOA4-RET fusion in colorectal cancer: Therapeutic challenge using patient-derived tumor cell lines                                                            | <a href="https://pubmed.ncbi.nlm.nih.gov/30210625/">https://pubmed.ncbi.nlm.nih.gov/30210625/</a> |
| 2018 | Andreasen    | The ETV6-RET Gene Fusion Is Found in ETV6-rearranged Low-grade Sinonasal Adenocarcinoma Without NTRK3 Involvement                                              | <a href="https://pubmed.ncbi.nlm.nih.gov/29683817/">https://pubmed.ncbi.nlm.nih.gov/29683817/</a> |
| 2018 | Weinreb      | Recurrent RET Gene Rearrangements in Intraductal Carcinomas of Salivary Gland                                                                                  | <a href="https://pubmed.ncbi.nlm.nih.gov/29443014/">https://pubmed.ncbi.nlm.nih.gov/29443014/</a> |
| 2018 | Salvi        | Evaluation of RET Gene Rearrangement by Fluorescence In Situ Hybridization in Malignant Mesothelioma                                                           | <a href="https://pubmed.ncbi.nlm.nih.gov/29258668/">https://pubmed.ncbi.nlm.nih.gov/29258668/</a> |
| 2018 | Ferrara      | Clinical and Translational Implications of RET Rearrangements in Non-Small Cell Lung Cancer                                                                    | <a href="https://pubmed.ncbi.nlm.nih.gov/29128428/">https://pubmed.ncbi.nlm.nih.gov/29128428/</a> |
| 2018 | Pietrantonio | RET fusions in a small subset of advanced colorectal cancers at risk of being neglected                                                                        | <a href="https://pubmed.ncbi.nlm.nih.gov/29538669/">https://pubmed.ncbi.nlm.nih.gov/29538669/</a> |
| 2018 | Skalova      | Molecular profiling of salivary gland intraductal carcinoma revealed a subset of tumors harboring NCOA4-RET and novel TRIM27-RET fusions: a report of 17 cases | <a href="https://pubmed.ncbi.nlm.nih.gov/30045065/">https://pubmed.ncbi.nlm.nih.gov/30045065/</a> |
| 2018 | Offin        | Immunophenotype and Response to Immunotherapy of RET-Rearranged Lung Cancers                                                                                   | <a href="https://pubmed.ncbi.nlm.nih.gov/31192313/">https://pubmed.ncbi.nlm.nih.gov/31192313/</a> |
| 2018 | Velizheva    | <b>Targeted next-generation-sequencing for reliable detection of targetable rearrangements in lung adenocarcinoma-a single center retrospective study</b>      | <a href="https://pubmed.ncbi.nlm.nih.gov/29580750/">https://pubmed.ncbi.nlm.nih.gov/29580750/</a> |
| 2019 | Musholt      | Detection of RET rearrangements in papillary thyroid carcinoma using RT-PCR and FISH techniques - A molecular and clinical analysis                            | <a href="https://pubmed.ncbi.nlm.nih.gov/30472213/">https://pubmed.ncbi.nlm.nih.gov/30472213/</a> |
| 2019 | Michal       | S100 and CD34 positive spindle cell tumor with prominent perivascular hyalinization and a novel NCOA4-RET fusion                                               | <a href="https://pubmed.ncbi.nlm.nih.gov/30938880/">https://pubmed.ncbi.nlm.nih.gov/30938880/</a> |

|      |          |                                                                                                                                                                                |                                                                                                                                                             |
|------|----------|--------------------------------------------------------------------------------------------------------------------------------------------------------------------------------|-------------------------------------------------------------------------------------------------------------------------------------------------------------|
| 2019 | Shang    | <b>Histology and oncogenic driver alterations of lung adenocarcinoma in Chinese</b>                                                                                            | <a href="https://pubmed.ncbi.nlm.nih.gov/31285953/">https://pubmed.ncbi.nlm.nih.gov/31285953/</a>                                                           |
| 2019 | Sakai    | Performance of Oncomine Fusion Transcript kit for formalin-fixed, paraffin-embedded lung cancer specimens                                                                      | <a href="https://pubmed.ncbi.nlm.nih.gov/30972901/">https://pubmed.ncbi.nlm.nih.gov/30972901/</a>                                                           |
| 2019 | Staubitz | Evaluation of RET Gene Rearrangement by Fluorescence In Situ Hybridization in Malignant Mesothelioma                                                                           | <a href="https://pubmed.ncbi.nlm.nih.gov/31425920/">https://pubmed.ncbi.nlm.nih.gov/31425920/</a>                                                           |
| 2019 | Skalova  | NCOA4-RET and TRIM27-RET Are Characteristic Gene Fusions in Salivary Intraductal Carcinoma, Including Invasive and Metastatic Tumors: Is "Intraductal" Correct?                | <a href="https://pubmed.ncbi.nlm.nih.gov/31162284/">https://pubmed.ncbi.nlm.nih.gov/31162284/</a>                                                           |
| 2019 | Prager   | Results of the extended analysis for cancer treatment (EXACT) trial: a prospective translational study evaluating individualized treatment regimens in oncology                | <a href="https://pubmed.ncbi.nlm.nih.gov/30847023/">https://pubmed.ncbi.nlm.nih.gov/30847023/</a>                                                           |
| 2019 | Lee      | Characteristics and outcomes of RET-rearranged Korean non-small cell lung cancer patients in real-world practice                                                               | <a href="https://pubmed.ncbi.nlm.nih.gov/32083304/">https://pubmed.ncbi.nlm.nih.gov/32083304/</a>                                                           |
| 2020 | Chen     | <b>Identifying a wide range of actionable variants using capture-based ultra-deep targeted sequencing in treatment-naïve patients with primary lung adenocarcinoma</b>         | <a href="https://pubmed.ncbi.nlm.nih.gov/32269691/">https://pubmed.ncbi.nlm.nih.gov/32269691/</a>                                                           |
| 2020 | Lu       | Intraductal Carcinoma of Salivary Glands Harboring TRIM27-RET Fusion with Mixed Low Grade and Apocrine Types                                                                   | <a href="https://pubmed.ncbi.nlm.nih.gov/30610524/">https://pubmed.ncbi.nlm.nih.gov/30610524/</a>                                                           |
| 2020 | Chou     | RET gene rearrangements occur in a subset of pancreatic acinar cell carcinomas                                                                                                 | <a href="https://pubmed.ncbi.nlm.nih.gov/31558784/">https://pubmed.ncbi.nlm.nih.gov/31558784/</a>                                                           |
| 2020 | Tan      | <b>Molecular Characterization and Clinical Outcomes in RET-Rearranged NSCLC</b>                                                                                                | <a href="https://pubmed.ncbi.nlm.nih.gov/32866654/">https://pubmed.ncbi.nlm.nih.gov/32866654/</a>                                                           |
| 2020 | Liu      | Pitfalls in RET fusion detection using break-apart FISH probes in papillary thyroid carcinoma                                                                                  | <a href="https://pubmed.ncbi.nlm.nih.gov/33382428/">https://pubmed.ncbi.nlm.nih.gov/33382428/</a>                                                           |
| 2020 | Cheek    | Uterine inflammatory myofibroblastic tumors in pregnant women with and without involvement of the placenta: a study of 6 cases with identification of a novel TIMP3-RET fusion | <a href="https://pubmed.ncbi.nlm.nih.gov/31917155/">https://pubmed.ncbi.nlm.nih.gov/31917155/</a>                                                           |
| 2020 | Loong    | Novel TFG-RET fusion in a spindle cell tumour with S100 and CD34 coexpression                                                                                                  | <a href="https://pubmed.ncbi.nlm.nih.gov/31411754/">https://pubmed.ncbi.nlm.nih.gov/31411754/</a>                                                           |
| 2020 | Sussman  | Validation of a Next-Generation Sequencing Assay Targeting RNA for the Multiplexed Detection of Fusion Transcripts and Oncogenic Isoforms                                      | <a href="https://pubmed.ncbi.nlm.nih.gov/31211614/">https://pubmed.ncbi.nlm.nih.gov/31211614/</a>                                                           |
| 2020 | Rooper   | Salivary Intraductal Carcinoma Arising within Intraparotid Lymph Node: A Report of 4 Cases with Identification of a Novel STRN-ALK Fusion                                      | <a href="https://pubmed.ncbi.nlm.nih.gov/32661669/">https://pubmed.ncbi.nlm.nih.gov/32661669/</a>                                                           |
| 2020 | Bishop   | Oncocytic Intraductal Carcinoma of Salivary Glands: A Distinct Variant with TRIM33-RET Fusions and BRAF V600E mutations                                                        | <a href="https://pubmed.ncbi.nlm.nih.gov/33135196/">https://pubmed.ncbi.nlm.nih.gov/33135196/</a>                                                           |
| 2020 | Sokolova | <b>Multiplex fast FISH assay for detecting ROS1, RET and MET aberrations in FFPE specimens using BioView image analysis</b>                                                    | <a href="https://cancerres.aacrjournals.org/content/80/16_Supplement/4256.short">https://cancerres.aacrjournals.org/content/80/16_Supplement/4256.short</a> |
| 2020 | Skalova  | Expanding the Molecular Spectrum of Secretory Carcinoma of Salivary Glands With a Novel VIM-RET Fusion                                                                         | <a href="https://pubmed.ncbi.nlm.nih.gov/32675658/">https://pubmed.ncbi.nlm.nih.gov/32675658/</a>                                                           |
| 2021 | Baker    | <b>Analytical Accuracy of RET Fusion Detection by Break-Apart Fluorescence In Situ Hybridization</b>                                                                           | <a href="https://pubmed.ncbi.nlm.nih.gov/34232984/">https://pubmed.ncbi.nlm.nih.gov/34232984/</a>                                                           |
| 2021 | Yang     | <b>A Performance Comparison of Commonly Used Assays to Detect RET Fusions</b>                                                                                                  | <a href="https://pubmed.ncbi.nlm.nih.gov/33272981/">https://pubmed.ncbi.nlm.nih.gov/33272981/</a>                                                           |

|      |                   |                                                                                                                                                                     |                                                                                                                     |
|------|-------------------|---------------------------------------------------------------------------------------------------------------------------------------------------------------------|---------------------------------------------------------------------------------------------------------------------|
| 2021 | Yamamoto          | Pan-Trk immunoreactivity, ETV6-NTRK3 fusion subtypes and RET rearrangement in salivary secretory carcinoma                                                          | <a href="https://pubmed.ncbi.nlm.nih.gov/33301751/">https://pubmed.ncbi.nlm.nih.gov/33301751/</a>                   |
| 2021 | Takeuchi          | <b>Phase 1/2 study of alectinib in RET-rearranged previously-treated non-small cell lung cancer (ALL-RET)</b>                                                       | <a href="https://tlcr.amegroups.com/article/view/46077/html">https://tlcr.amegroups.com/article/view/46077/html</a> |
| 2021 | Campanha Novaes   | Simultaneous analysis of ALK, RET, and ROS1 gene fusions by NanoString in Brazilian lung adenocarcinoma patients                                                    | <a href="https://tlcr.amegroups.com/article/view/48020/html">https://tlcr.amegroups.com/article/view/48020/html</a> |
| 2021 | Radonic           | <b>RET FISH analysis is a sensitive but highly unspecific screening method for RET fusions in lung cancer</b>                                                       | <a href="https://pubmed.ncbi.nlm.nih.gov/33588111/">https://pubmed.ncbi.nlm.nih.gov/33588111/</a>                   |
| 2022 | Feng              | <b>Clinicopathologic characteristics and diagnostic methods of RET rearrangement in Chinese non-small cell lung cancer patients</b>                                 | <a href="https://pubmed.ncbi.nlm.nih.gov/35529790/">https://pubmed.ncbi.nlm.nih.gov/35529790/</a>                   |
| 2022 | Shi               | Identification of a novel LDLR-RET Fusion in Lung Adenocarcinoma                                                                                                    | <a href="https://pubmed.ncbi.nlm.nih.gov/35524867/">https://pubmed.ncbi.nlm.nih.gov/35524867/</a>                   |
| 2022 | Ambrosini-Spaltro | <b>The role of next-generation sequencing in detecting gene fusions with known and unknown partners: a single-center experience with methodologies' integration</b> | <a href="https://pubmed.ncbi.nlm.nih.gov/35181377/">https://pubmed.ncbi.nlm.nih.gov/35181377/</a>                   |
| 2022 | Liu               | Profiling of gene fusion involving targetable genes in Chinese gastric cancer                                                                                       | <a href="https://pubmed.ncbi.nlm.nih.gov/36160735/">https://pubmed.ncbi.nlm.nih.gov/36160735/</a>                   |
| 2023 | Chen              | Highly sensitive droplet digital PCR for detection of RET fusion in papillary thyroid cancer                                                                        | <a href="https://pubmed.ncbi.nlm.nih.gov/37081420/">https://pubmed.ncbi.nlm.nih.gov/37081420/</a>                   |

**Supplementary Table S2. RET FISH studies on lung cancer reported in the literature.**

| Author                 | Year | LUNG cases studied for RET | RET cases detected (any technique) | techniques                     | RET FISH+ cases | RET FISH+ cases compare with other molecular technique | RET+ FISH samples confirmed by other molecular technique | probe mentioned               | cutoff | pattern (positive)                   | comments                           |
|------------------------|------|----------------------------|------------------------------------|--------------------------------|-----------------|--------------------------------------------------------|----------------------------------------------------------|-------------------------------|--------|--------------------------------------|------------------------------------|
| Suehara <sup>21</sup>  | 2012 | 69                         | 1                                  | Nanostring, FISH               | 1               | 1                                                      | 1                                                        | BAC probe                     | 10%    | split signals                        | FISH for confirmation              |
| Kohno <sup>45</sup>    | 2012 | 319                        | 6                                  | RTqPCR, Sanger, FISH           | 6               | 6                                                      | 6                                                        | GSP Research Inc.             | NA     | NA                                   | FISH for confirmation              |
| Sasaki <sup>10</sup>   | 2012 | 157                        | 3                                  | RT-PCR, IHC, FISH              | 2               | 2                                                      | 2                                                        | KIF5B/RET (GSP Research Inc.) | 15%    | KIF5B/RET *                          | <i>Not a break apart RET probe</i> |
| Wang <sup>14</sup>     | 2012 | 936                        | 13                                 | RT-PCR, IHC, FISH              | 13              | 13                                                     | 13                                                       | NA                            | > 20%  | split signals                        | FISH for confirmation              |
| Takeuchi <sup>1</sup>  | 2012 | 1529                       | 23                                 | RTqPCR, FISH                   | 22              | 22                                                     | 12                                                       | NA                            | NA     | NA                                   | screening by FISH                  |
| Go <sup>8</sup>        | 2013 | 53                         | 3                                  | NGS (transcriptome), FISH      | 3               | 3                                                      | 3                                                        | Macrogen                      | > 15%  | split signals                        | screening by FISH                  |
| Drilon <sup>48</sup>   | 2013 | 31                         | 5                                  | FISH, RT-PCR                   | 5               | 0                                                      | 0                                                        | NA                            | 10%    | split signals or isolated 3'         | <i>No technique comparison</i>     |
| Borrelli <sup>15</sup> | 2013 | 49                         | 1                                  | RTqPCR, FISH                   | 1               | 1                                                      | 1                                                        | Leica                         | 15%    | split signals or isolated 5' signals | FISH for confirmation              |
| Pan <sup>16</sup>      | 2014 | 1139                       | 15                                 | RTqPCR, FISH                   | 15              | 15                                                     | 15                                                       | BAC probe                     | >15%   | NA                                   | FISH for confirmation              |
| Mizukami <sup>43</sup> | 2014 | 352                        | 10                                 | RT-PCR, FISH only in 3 samples | 2               | NA                                                     | NA                                                       | CSL                           | NA     | NA                                   | <i>Not clear validation</i>        |
| Tsuta <sup>2</sup>     | 2014 | 1874                       | 50                                 | IHC, RTqPCR, FISH              | 50              | 29                                                     | 16                                                       | CSL                           | ≥20%   | split signals or isolated 3'         | screening by FISH                  |

|                        |      |      |             |                               |    |    |                   |            |                    |                                |                                                                     |
|------------------------|------|------|-------------|-------------------------------|----|----|-------------------|------------|--------------------|--------------------------------|---------------------------------------------------------------------|
| Lira <sup>22</sup>     | 2014 | 295  | 15          | Nanostring, FISH              | 15 | 15 | 15                | Zytovision | NA                 | NA                             | FISH for confirmation                                               |
| Platt <sup>47</sup>    | 2015 | 944  | 7           | IHC,FISH                      | NA | NA | NA                | BAC probe  | >10%               | split signals                  | <i>no validation by another molecular technique</i>                 |
| Subbiah <sup>41</sup>  | 2015 | 1    | case report | NGS (exome), FISH             | 1  | 1  | 0                 | CymoGen    | NA                 | NA                             | <i>case report</i>                                                  |
| Drilon <sup>49</sup>   | 2015 | 31   | 3           | NGS-DNA, FISH                 | 0  | NA | NA                | NA         | NA                 | NA                             | <i>Incomplete comparison data</i>                                   |
| Lee <sup>13</sup>      | 2015 | 295  | 15          | IHC, FISH, NanoString         | 14 | 14 | 14                | Zytovision | > 15 %             | split signals                  | FISH for confirmation                                               |
| Kim <sup>17</sup>      | 2015 | 154  | 9           | RTqPCR, FISH                  | 9  | 9  | 9                 | Zytovision | > 15 %             | split signals                  | FISH for confirmation                                               |
| Drilon                 | 2016 | NA   | 26          | FISH, NGS                     | NA | NA | NA                | BAC probe  | NA                 | NA                             | <i>No technique comparison</i>                                      |
| Song <sup>12</sup>     | 2016 | 615  | 12          | RTqPCR, FISH, NGS-RNA         | 11 | 11 | 11                | Abbott     | >15%               | split signals                  | FISH for confirmation                                               |
| Lee <sup>36</sup>      | 2016 | 1    | 1           | IHC, RET                      | 1  | 1  | 1                 | Zytovision | NA                 | NA                             | <i>case report</i>                                                  |
| Michels <sup>35</sup>  | 2016 | 997  | 22          | FISH                          | 22 | NA | NA                | Zytovision | ≥20% and ≥15%      | split signals or isolated 3'   | <i>No comparison. Only FISH was used</i>                            |
| Lu <sup>34</sup>       | 2016 | 32   | 0           | FISH                          | 0  | 0  | 0                 | Zytovision | >15%               | split signals                  | <i>No comparison. None of the specimens had a RET rearrangement</i> |
| Pailler <sup>31</sup>  | 2016 | NA   | NA          | FISH, FCM                     | NA | NA | NA                | Zytovision | NA                 | NA                             | <i>No validation by molecular technique</i>                         |
| Tanaka <sup>20</sup>   | 2017 | 46   | 4           | rtPCR, FISH                   | 4  | 4  | 2                 | Agilent    | NA                 | NA                             | FISH for confirmation                                               |
| Lee <sup>44</sup>      | 2017 | 306  | 26          | FISH, IHC, PCR, NGS-DNA       | 26 | 10 | 8                 | Macrogen   | NA                 | NA                             | screening by FISH                                                   |
| Yoh <sup>50</sup>      | 2017 | 1433 | 34          | RTqPCR, FISH                  | 19 | 19 | 19                | NA         | > 15%              | NA                             | FISH for confirmation                                               |
| Zhang <sup>42</sup>    | 2017 | 1    | case report | NGS-DNA, FISH                 | 1  | 1  | 1                 | CytoTest   | NA                 | NA                             | <i>case report</i>                                                  |
| Song <sup>18</sup>     | 2017 | 385  | 2           | RTqPCR, FISH                  | 2  | 2  | 2                 | Abbott     | >15%               | split signals                  | FISH for confirmation                                               |
| Reguart <sup>19</sup>  | 2017 | 98   | 2           | IHC, RT-PCR, Nanostring, FISH | 2  | 2  | 2                 | Zytovision | 15%                | split signals and/or single 3' | FISH for confirmation                                               |
| Dugay <sup>30</sup>    | 2017 | 713  | 18          | FISH                          | 18 | NA | NA                | Zytovision | 15%                | split signals or isolated 3'   | <i>No comparison. Only FISH was used</i>                            |
| Catelain <sup>32</sup> | 2017 | 5    | 5           | FISH, FCM                     | NA | NA | NA                | Zytovision | NA                 | NA                             | <i>No validation by molecular technique</i>                         |
| Rogers <sup>3</sup>    | 2017 | 51   | 1           | Nanostring, FISH              | 1  | 1  | 1 (only by Agena) | Zytovision | ≥ 15%              | split signals                  | screening by FISH                                                   |
| Tang <sup>40</sup>     | 2018 | 2379 | 33          | FISH, NGS-DNA                 | 33 | NA | NA                | CymoGen    | >3.1%, >4.4% >7.9% | NA                             | <i>No technique comparison</i>                                      |
| Uguen <sup>38</sup>    | 2018 | 56   | 1           | IHC, FISH                     | 1  | NA | NA                | Leica      | NA                 | NA                             | <i>No technique comparison. 1 case was detected only by FISH.</i>   |

|                                 |      |       |     |                                 |    |    |    |                                  |             |                                             |                                                         |
|---------------------------------|------|-------|-----|---------------------------------|----|----|----|----------------------------------|-------------|---------------------------------------------|---------------------------------------------------------|
| Velizheva <sup>23</sup>         | 2018 | 52    | 1   | NGS-RNA, FISH                   | 1  | 1  | 1  | Zytovision                       | ≥ 15%       | split signals                               | FISH for confirmation                                   |
| Piton <sup>9</sup>              | 2018 | 39    | 1   | Ligation-dependent RT-PCR, FISH | 1  | 1  | 1  | Zytovision                       | < 20%       | split signals or isolated 3'                | screening by FISH                                       |
| Kim <sup>7</sup>                | 2018 | 581   | 51  | FISH,IHC, RT-PCR, Nanostring    | 51 | 51 | 3  | Zytovision                       | NA          | split signals                               | screening by FISH                                       |
| Shang <sup>24</sup>             | 2019 | 897   | 20  | RT-PCR, FISH                    | 20 | 20 | 20 | BAC probe                        | NA          | NA                                          | FISH for confirmation                                   |
| Offin <sup>46</sup>             | 2019 | 74    | 74  | NGS-DNA, RT-PCR (RNA), FISH     | 11 | NA | NA | Metasystems                      | NA          | NA                                          | <i>No technique comparison</i>                          |
| Prager <sup>39</sup>            | 2019 | NA    | 0   | NGS-DNA, IHC, FISH              | NA | NA | NA | Leica                            | NA          | NA                                          | <i>No validation between techniques. Data not shown</i> |
| Lee <sup>51</sup>               | 2020 | 59    | 59  | NGS-RNA, FISH                   | 8  | NA | NA | NA                               | NA          | NA                                          | <i>Not clear validation</i>                             |
| Chen <sup>24</sup>              | 2020 | 372   | 10  | NGS-DNA, FISH                   | 10 | 10 | 10 | CytoTest                         | NA          | NA                                          | FISH for confirmation                                   |
| Sokolova <sup>37</sup>          | 2020 | 55    | 3   | NGS-RNA or RT-PCR, FISH         | 3  | 3  | 3  | Abbott                           | >15%        | NA                                          | FISH for confirmation                                   |
| Tan <sup>4</sup>                | 2020 | 64    | 30  | NGS-RNA, FISH                   | 30 | 9  | 6  | Abbott                           | ≥ 15%       | split signals or isolated 3'                | screening by FISH (3FP and 2FN)                         |
| Takeuchi <sup>11</sup>          | 2021 | 4,552 | 119 | NGS-RNA, RT-PCR, FISH           | 34 | 34 | 34 | NA                               | NA          | NA                                          | FISH for confirmation                                   |
| Baker <sup>6</sup>              | 2021 | 21    | 8   | NGS-RNA, FISH                   | 8  | 8  | 5  | Abbott                           | 13% and 19% | split signals or isolated 3' or isolated 5' | screening by FISH                                       |
| Radonic <sup>5</sup>            | 2021 | 2858  | 48  | NGS-RNA, FISH                   | 48 | 30 | 9  | Abbott, Agilent, Leica, CytoCell | ≥ 15%       | split signals or isolated 3'                | screening by FISH (21FP)                                |
| Yang <sup>26</sup>              | 2021 | 5920  | 99  | NGS-DNA,FISH, IHC               | 27 | 27 | 27 | Zytovision                       | ≥10%        | split signals or isolated 3'                | FISH for confirmation                                   |
| Campanha Novaes <sup>33</sup>   | 2021 | 134   | 2   | Nanostring, FISH                | 0  | 0  | 0  | Zytovision                       | > 15%       | NA                                          | <i>Inconclusive results</i>                             |
| Shi <sup>27</sup>               | 2022 | 1     | 1   | NGS-DNA, FISH                   | 1  | 1  | 1  | LBP                              | ≥15%        | split signals or isolated 3'                | <i>case report</i>                                      |
| Feng <sup>28</sup>              | 2022 | 9,101 | 138 | NGS-DNA, NGS-RNA, FISH, IHC     | 25 | 25 | 25 | LBP                              | ≥15%        | split signals or isolated 3'                | FISH for confirmation                                   |
| Ambrosini-Spaltro <sup>29</sup> | 2022 | 1174  | 21  | RNA-NGS, FISH                   | 2  | 2  | 2  | Abbott                           | 10%         | NA                                          | FISH for confirmation                                   |

NA: Not available

Zytovision: ZytoLight SPEC RET Dual Break Apart Probe (Zytovision GmbH, Bremerhaven, Germany)

Abbott: Vysis RET break-apart (Abbott Molecular, Abbott Park, Illinois)

Leica: RET (10q11) Kreatech (Leica Biosystems, Wetzlar, Germany)

Agilent: Dako SureFISH RET BA (Agilent, Santa Clara, California)

CymoGen: Clear-View FISH RET dual color, breakapart probe from CymoGen DX (Biocare Medical)

CytoTest: RET break apart FISH probe (CytoTest, USA)

CSL: RET dual-colour break-apart probe (Chromosome Science Labo, Inc., Sapporo, Japan)

MacroGen: (LSI) RET dual-color break-apart probe (MacroGen Inc., Seoul, Korea)

GSP: break-apart probe for RET (GSP laboratory, Kawasaki, Japan).

LBP: RET (10q11) dual-color break-apart rearrangement probe (LBP Medicine Science and Technology, Guangzhou)

Metasystems: 10q11 and 6q22 break apart probe (Metasystems, Altusheim, Germany)

Cytocell: Cytocell Aquarius (Cytocell Cambridge, UK)

\*one probe was a KIF5B/RET probe developed at GSP Research Inc.



**Supplementary Table S3: Commercial break-apart RET FISH probes used in the literature**

| Manufacturer                                        | Commercial break-apart <i>RET</i> FISH probes mentioned in a total of 40 publications |
|-----------------------------------------------------|---------------------------------------------------------------------------------------|
| ZytoVision <sup>3,7,9,13,17,19,22,23,26,30-36</sup> | 16 (37%)                                                                              |
| Abbott <sup>4-6,12,18,29,37</sup>                   | 7 (16%)                                                                               |
| Leica <sup>5,15,38,39</sup>                         | 4 (9%)                                                                                |
| Agilent <sup>5,20</sup>                             | 2 (5%)                                                                                |
| CymoGen Dx <sup>40,41</sup>                         | 2 (5%)                                                                                |
| CytoTest <sup>25,42</sup>                           | 2 (5%)                                                                                |
| CSL <sup>2,43</sup>                                 | 2 (5%)                                                                                |
| Macrogen <sup>8,44</sup>                            | 2 (5%)                                                                                |
| GSP Research Inc. <sup>27,45</sup>                  | 1+1* (5%)                                                                             |
| LBP <sup>28</sup>                                   | 2 (5%)                                                                                |
| Metasystems <sup>46</sup>                           | 1 (2%)                                                                                |
| Cytocell <sup>5</sup>                               | 1 (2%)                                                                                |

Zytovision: ZytoLight SPEC RET Dual Break Apart Probe (Zytovision GmbH, Bremerhaven, Germany)

Abbott: Vysis RET break-apart (Abbott Molecular, Abbott Park, Illinois)

Leica: RET (10q11) Kreatech (Leica Biosystems, Wetzlar, Germany)

Agilent: Dako SureFISH RET BA (Agilent, Santa Clara, California)

CymoGen: Clear-View FISH RET dual color, breakapart probe from CymoGen DX (Biocare Medical)

CytoTest: RET break apart FISH probe (CytoTest, USA)

CSL: RET dual-colour break-apart probe (Chromosome Science Labo, Inc., Sapporo, Japan)

Macrogen: (LSI) RET dual-color break-apart probe (Macrogen Inc., Seoul, Korea)

GSP: break-apart probe for RET (GSP laboratory, Kawasaki, Japan).

LBP: RET (10q11) dual-color break-apart rearrangement probe (LBP Medicine Science and Technology, Guangzhou)

Metasystems: 10q11 and 6q22 break apart probe (Metasystems, Altusheim, Germany)

Cytocell: Cytocell Aquarius (Cytocell Cambridge, UK)

\*one probe was a KIF5B/RET probe developed at GSP Research Inc.

**Supplementary Table S4: RET-FISH patterns**

| <b>RET-FISH patterns considered to be positive</b>       | <b>Number of publications</b>           |
|----------------------------------------------------------|-----------------------------------------|
| split signals and/or isolated 3' signals                 | 11 <sup>2,4,5,9,19,26-28,30,35,48</sup> |
| split signals only                                       | 12 <sup>3,17,23,34,36,38,48</sup>       |
| split signals and/or isolated 5' signals                 | 1 <sup>19</sup>                         |
| <i>KIF5B-RET</i> fusion                                  | 1 <sup>8</sup>                          |
| split signals or isolated 3' signals/isolated 5' signals | 1 <sup>6</sup>                          |
| <b>Total</b>                                             | <b>26</b>                               |

## References used in Tables S2, S3 and S4

1. Takeuchi K, Soda M, Togashi Y, et al. RET, ROS1 and ALK fusions in lung cancer. *Nat Med*. 2012;18(3):378-381. doi:10.1038/nm.2658
2. Tsuta K, Kohno T, Yoshida A, et al. RET-rearranged non-small-cell lung carcinoma: a clinicopathological and molecular analysis. *Br J Cancer*. 2014;110(6):1571-1578. doi:10.1038/bjc.2014.36
3. Rogers TM, Arnau GM, Ryland GL, et al. Multiplexed transcriptome analysis to detect ALK, ROS1 and RET rearrangements in lung cancer. *Sci Rep*. 2017;7(1):42259. doi:10.1038/srep42259
4. Tan AC, Seet AOL, Lai GGY, et al. Molecular Characterization and Clinical Outcomes in RET-Rearranged NSCLC. *J Thorac Oncol*. 2020;15(12):1928-1934. doi:10.1016/j.jtho.2020.08.011
5. Radonic T, Geurts-Giele WRR, Samsom KG, et al. RET Fluorescence In Situ Hybridization Analysis Is a Sensitive but Highly Unspecific Screening Method for RET Fusions in Lung Cancer. *J Thorac Oncol*. 2021;16(5):798-806. doi:10.1016/j.jtho.2021.01.1619
6. Baker JA, Sireci AN, Marella N, et al. Analytical Accuracy of RET Fusion Detection by Break-Apart Fluorescence In Situ Hybridization. *Arch Pathol Lab Med*. Published online July 8, 2021. doi:10.5858/arpa.2020-0376-OA
7. Kim JO, Shin JY, Kim MY, et al. Detection of RET (rearranged during transfection) variants and their downstream signal molecules in RET rearranged lung adenocarcinoma patients. *Surg Oncol*. 2018;27(1):106-113. doi:10.1016/j.suronc.2018.01.006
8. Go H, Jung YJ, Kang HW, et al. Diagnostic method for the detection of KIF5B-RET transformation in lung adenocarcinoma. *Lung Cancer*. 2013;82(1):44-50. doi:10.1016/j.lungcan.2013.07.009
9. Piton N, Ruminy P, Gravet C, et al. Ligation-dependent RT-PCR: a new specific and low-cost technique to detect ALK, ROS, and RET rearrangements in lung adenocarcinoma. *Lab Invest*. 2018;98(3):371-379. doi:10.1038/labinvest.2017.124
10. Sasaki H, Shimizu S, Tani Y, et al. RET expression and detection of *KIF5B* / *RET* gene rearrangements in Japanese lung cancer. *Cancer Med*. 2012;1(1):68-75. doi:10.1002/cam4.13
11. Takeuchi S, Yanagitani N, Seto T, et al. Phase 1/2 study of alectinib in RET-rearranged previously-treated non-small cell lung cancer (ALL-RET). *Transl Lung Cancer Res*. 2021;10(1):314-325. doi:10.21037/tlcr-20-549
12. Song Z, Yu X, Zhang Y. Clinicopathologic characteristics, genetic variability and therapeutic options of RET rearrangements patients in lung adenocarcinoma. *Lung Cancer*. 2016;101:16-21. doi:10.1016/j.lungcan.2016.09.002
13. Lee SE, Lee B, Hong M, et al. Comprehensive analysis of RET and ROS1 rearrangement in lung adenocarcinoma. *Mod Pathol*. 2015;28(4):468-479. doi:10.1038/modpathol.2014.107

14. Wang R, Hu H, Pan Y, et al. *RET* Fusions Define a Unique Molecular and Clinicopathologic Subtype of Non–Small-Cell Lung Cancer. *J Clin Oncol*. 2012;30(35):4352-4359. doi:10.1200/JCO.2012.44.1477
15. Borrelli N, Giannini R, Proietti A, et al. KIF5B/*RET* fusion gene analysis in a selected series of cytological specimens of EGFR, KRAS and EML4-ALK wild-type adenocarcinomas of the lung. *Lung Cancer*. 2013;81(3):377-381. doi:10.1016/j.lungcan.2013.06.026
16. Pan Y, Zhang Y, Li Y, et al. ALK, ROS1 and *RET* fusions in 1139 lung adenocarcinomas: A comprehensive study of common and fusion pattern-specific clinicopathologic, histologic and cytologic features. *Lung Cancer*. 2014;84(2):121-126. doi:10.1016/j.lungcan.2014.02.007
17. Kim JO, Lee J, Shin JY, et al. KIF5B-*RET* Fusion gene may coincide oncogenic mutations of EGFR or KRAS gene in lung adenocarcinomas. *Diagn Pathol*. 2015;10(1):143. doi:10.1186/s13000-015-0368-z
18. Song Z, Yu X, Zhang Y. Clinicopathological characteristics and survival of ALK, ROS1 and *RET* rearrangements in non-adenocarcinoma non-small cell lung cancer patients. *Cancer Biol Ther*. 2017;18(11):883-887. doi:10.1080/15384047.2016.1235660
19. Reguart N, Teixidó C, Giménez-Capitán A, et al. Identification of ALK, ROS1, and *RET* Fusions by a Multiplexed mRNA-Based Assay in Formalin-Fixed, Paraffin-Embedded Samples from Advanced Non–Small-Cell Lung Cancer Patients. *Clin Chem*. 2017;63(3):751-760. doi:10.1373/clinchem.2016.265314
20. Tanaka K, Hida T, Oya Y, et al. Unique prevalence of oncogenic genetic alterations in young patients with lung adenocarcinoma: Young Patients With Lung Adenocarcinoma. *Cancer*. 2017;123(10):1731-1740. doi:10.1002/cncr.30539
21. Suehara Y, Arcila M, Wang L, et al. Identification of *KIF5B-RET* and *GOPC-ROS1* Fusions in Lung Adenocarcinomas through a Comprehensive mRNA-Based Screen for Tyrosine Kinase Fusions. *Clin Cancer Res*. 2012;18(24):6599-6608. doi:10.1158/1078-0432.CCR-12-0838
22. Lira ME, Choi YL, Lim SM, et al. A Single-Tube Multiplexed Assay for Detecting ALK, ROS1, and *RET* Fusions in Lung Cancer. *J Mol Diagn*. 2014;16(2):229-243. doi:10.1016/j.jmoldx.2013.11.007
23. Velizheva NP, Rechsteiner MP, Valtcheva N, et al. Targeted next-generation-sequencing for reliable detection of targetable rearrangements in lung adenocarcinoma—a single center retrospective study. *Pathol - Res Pract*. 2018;214(4):572-578. doi:10.1016/j.prp.2018.02.001
24. Shang G, Jin Y, Zheng Q, et al. Histology and oncogenic driver alterations of lung adenocarcinoma in Chinese. *Am J Cancer Res*. 2019;9(6):1212-1223.
25. Chen L, Chen M, Lin J, et al. Identifying a wide range of actionable variants using capture-based ultra-deep targeted sequencing in treatment-naive patients with primary lung adenocarcinoma. *Int J Clin Exp Pathol*. 2020;13(3):525-535.
26. Yang SR, Aypar U, Rosen EY, et al. A Performance Comparison of Commonly Used Assays to Detect *RET* Fusions. *Clin Cancer Res*. 2021;27(5):1316-1328. doi:10.1158/1078-0432.CCR-20-3208

27. Shi G, Luo Y, Yu Z, Wang Y, Zhu B. Identification of a novel LDLR-RET Fusion in Lung Adenocarcinoma. *Invest New Drugs*. 2022;40(4):858-860. doi:10.1007/s10637-022-01246-2
28. Feng J, Li Y, Wei B, et al. Clinicopathologic characteristics and diagnostic methods of RET rearrangement in Chinese non-small cell lung cancer patients. *Transl Lung Cancer Res*. 2022;11(4):617-631. doi:10.21037/tlcr-22-202
29. Ambrosini-Spaltro A, Farnedi A, Calistri D, et al. The role of next-generation sequencing in detecting gene fusions with known and unknown partners: a single-center experience with methodologies' integration. *Hum Pathol*. 2022;123:20-30. doi:10.1016/j.humpath.2022.02.005
30. Dugay F, Llamas-Gutierrez F, Gournay M, et al. Clinicopathological characteristics of *ROS1*- and *RET*- rearranged NSCLC in caucasian patients: Data from a cohort of 713 non-squamous NSCLC lacking *KRAS/EGFR/HER2/BRAF/PIK3CA/ALK* alterations. *Oncotarget*. 2017;8(32):53336-53351. doi:10.18632/oncotarget.18408
31. Pailler E, Oulhen M, Billiot F, et al. Method for semi-automated microscopy of filtration-enriched circulating tumor cells. *BMC Cancer*. 2016;16(1):477. doi:10.1186/s12885-016-2461-4
32. Catelain C, Pailler E, Oulhen M, Faugereux V, Pommier AL, Farace F. Detection of Gene Rearrangements in Circulating Tumor Cells: Examples of ALK-, ROS1-, RET-Rearrangements in Non-Small-Cell Lung Cancer and ERG-Rearrangements in Prostate Cancer. In: Magbanua MJM, Park JW, eds. *Isolation and Molecular Characterization of Circulating Tumor Cells*. Vol 994. Advances in Experimental Medicine and Biology. Springer International Publishing; 2017:169-179. doi:10.1007/978-3-319-55947-6\_9
33. Novaes LAC, Sussuchi da Silva L, De Marchi P, et al. Simultaneous analysis of ALK, RET, and ROS1 gene fusions by NanoString in Brazilian lung adenocarcinoma patients. *Transl Lung Cancer Res*. 2021;10(1):292-303. doi:10.21037/tlcr-20-740
34. Lu H, Xu H, Xie F, et al. 1p/19q codeletion and RET rearrangements in small-cell lung cancer. *OncoTargets Ther*. Published online June 2016:3571. doi:10.2147/OTT.S108781
35. Michels S, Scheel AH, Scheffler M, et al. Clinicopathological Characteristics of RET Rearranged Lung Cancer in European Patients. *J Thorac Oncol*. 2016;11(1):122-127. doi:10.1016/j.jtho.2015.09.016
36. Lee MS, Kim RN, I H, et al. Identification of a novel partner gene, *KIAA1217*, fused to *RET*: Functional characterization and inhibitor sensitivity of two isoforms in lung adenocarcinoma. *Oncotarget*. 2016;7(24):36101-36114. doi:10.18632/oncotarget.9137
37. Sokolova IA, Bedroske P, Grushko TA, et al. Abstract 4256: Multiplex fast FISH assay for detecting ROS1, RET and MET aberrations in FFPE specimens using BioView image analysis. *Cancer Res*. 2020;80(16 Supplement):4256. doi:10.1158/1538-7445.AM2020-4256
38. Uguen M, Dewitte JD, Marcorelles P, et al. Asbestos-related lung cancers: A retrospective clinical and pathological study. *Mol Clin Oncol*. 2017;7(1):135-139. doi:10.3892/mco.2017.1277

39. Prager GW, Unsel M, Waneck F, et al. Results of the extended analysis for cancer treatment (EXACT) trial: a prospective translational study evaluating individualized treatment regimens in oncology. *Oncotarget*. 2019;10(9):942-952. doi:10.18632/oncotarget.26604
40. Tang Z, Zhang J, Lu X, et al. Coexistent genetic alterations involving ALK, RET, ROS1 or MET in 15 cases of lung adenocarcinoma. *Mod Pathol Off J U S Can Acad Pathol Inc*. 2018;31(2):307-312. doi:10.1038/modpathol.2017.109
41. Subbiah V, Berry J, Roxas M, et al. Systemic and CNS activity of the RET inhibitor vandetanib combined with the mTOR inhibitor everolimus in KIF5B-RET re-arranged non-small cell lung cancer with brain metastases. *Lung Cancer*. 2015;89(1):76-79. doi:10.1016/j.lungcan.2015.04.004
42. Zhang X, Li Y, Liu C, et al. Identification of a novel KIF13A-RET fusion in lung adenocarcinoma by next-generation sequencing. *Lung Cancer*. 2018;118:27-29. doi:10.1016/j.lungcan.2017.08.019
43. Mizukami T, Shiraishi K, Shimada Y, et al. Molecular Mechanisms Underlying Oncogenic RET Fusion in Lung Adenocarcinoma. *J Thorac Oncol*. 2014;9(5):622-630. doi:10.1097/JTO.000000000000135
44. Lee SH, Lee JK, Ahn MJ, et al. Vandetanib in pretreated patients with advanced non-small cell lung cancer-harboring RET rearrangement: a phase II clinical trial. *Ann Oncol*. 2017;28(2):292-297. doi:10.1093/annonc/mdw559
45. Kohno T, Ichikawa H, Totoki Y, et al. KIF5B-RET fusions in lung adenocarcinoma. *Nat Med*. 2012;18(3):375-377. doi:10.1038/nm.2644
46. Offin M, Guo R, Wu SL, et al. Immunophenotype and Response to Immunotherapy of RET-Rearranged Lung Cancers. *JCO Precis Oncol*. 2019;(3):1-8. doi:10.1200/PO.18.00386
47. Platt A, Morten J, Ji Q, et al. A retrospective analysis of RET translocation, gene copy number gain and expression in NSCLC patients treated with vandetanib in four randomized Phase III studies. *BMC Cancer*. 2015;15(1):171. doi:10.1186/s12885-015-1146-8
48. Drilon A, Wang L, Hasanovic A, et al. Response to Cabozantinib in Patients with RET Fusion-Positive Lung Adenocarcinomas. *Cancer Discov*. 2013;3(6):630-635. doi:10.1158/2159-8290.CD-13-0035
49. Drilon A, Wang L, Arcila ME, et al. Broad, Hybrid Capture–Based Next-Generation Sequencing Identifies Actionable Genomic Alterations in Lung Adenocarcinomas Otherwise Negative for Such Alterations by Other Genomic Testing Approaches. *Clin Cancer Res*. 2015;21(16):3631-3639. doi:10.1158/1078-0432.CCR-14-2683
50. Yoh K, Seto T, Satouchi M, et al. Vandetanib in patients with previously treated RET-rearranged advanced non-small-cell lung cancer (LURET): an open-label, multicentre phase 2 trial. *Lancet Respir Med*. 2017;5(1):42-50. doi:10.1016/S2213-2600(16)30322-8
51. Lee J, Ku BM, Shim JH, et al. Characteristics and outcomes of RET-rearranged Korean non-small cell lung cancer patients in real-world practice. *Jpn J Clin Oncol*. 2020;50(5):594-601. doi:10.1093/jjco/hyaa019
